# Supplementary material for: How Did Zika Virus Emerge in the Pacific Islands and Latin America?
Source: PubMed Central journal article supplement (PMC5061869; doi:10.1128/mbio.01239-16), 2016-10-11

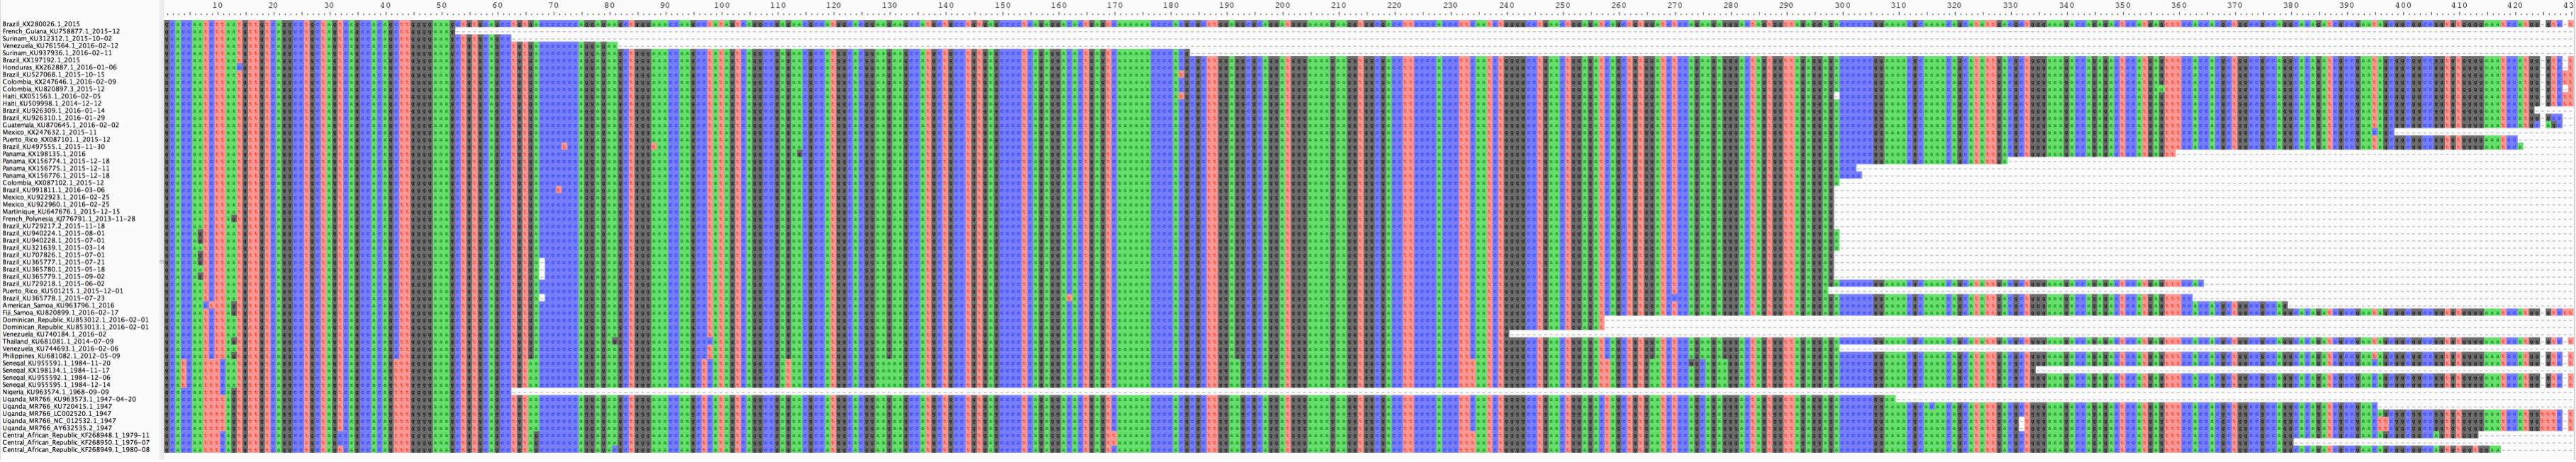

Supplement: mbo005163018sf2.pdf [file mbo005163018sf2.pdf]
